# Supplementary material for: Highly Eu3+ ions doped novel red emission solid solution phosphors Ca18Li3(Bi,Eu)(PO4)14: structure design, characteristic luminescence and abnormal thermal quenching behavior investigation
Source: Royal Society of Chemistry journal article supplement (doi:10.1039/c8dt04047h), 2018-11-21
Supplement: c8dt04047h1.pdf [file c8dt04047h1.pdf]

Supporting Information

**Highly Eu<sup>3+</sup> ions doped novel red emission solid solution  
phosphors Ca<sub>18</sub>Li<sub>3</sub>(Bi,Eu)(PO<sub>4</sub>)<sub>14</sub>: structure design,  
characteristic luminescence and abnormal thermal  
quenching behavior investigation**

Ge Zhu<sup>a</sup>, Zhuowei Li<sup>a</sup>, Chuang Wang<sup>a</sup>, Xuejiao Wang<sup>a</sup>, Faguang Zhou<sup>a</sup>, Miao Gao<sup>a</sup>,  
Shuangyu Xin<sup>a,\*</sup>, Yuhua Wang<sup>b,\*</sup>

<sup>a</sup>College of New Energy, Bohai University, Jinzhou, Liaoning, 121000, People's  
Republic of China

<sup>b</sup>School of Physical Science and Technology, Lanzhou University, Lanzhou, 730000,  
P.R. China.

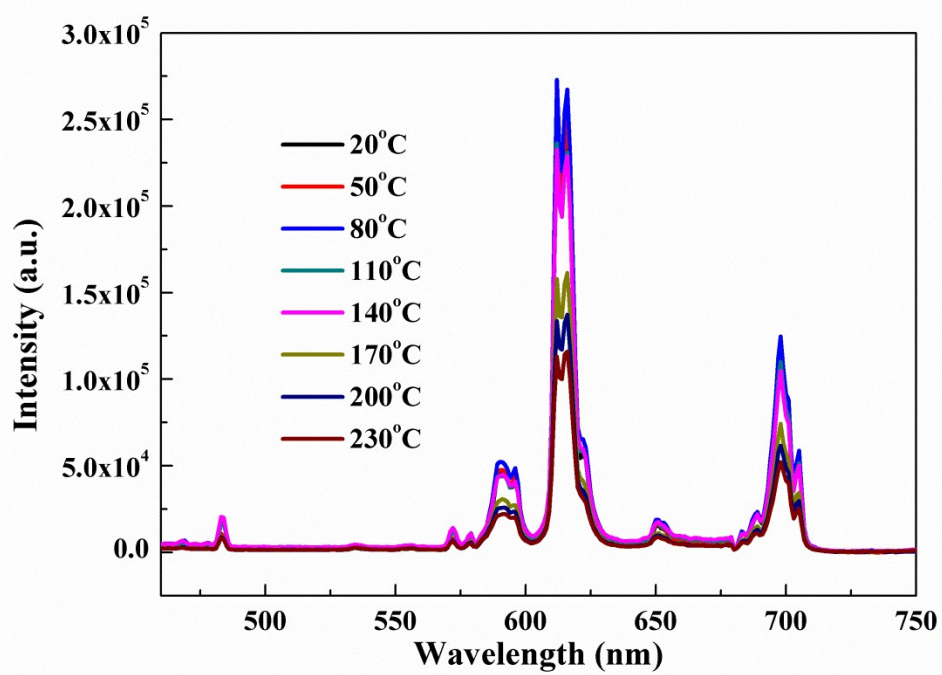

Fig. S1 The temperature dependent emission spectra of CLBP:0.8Eu<sup>3+</sup>.

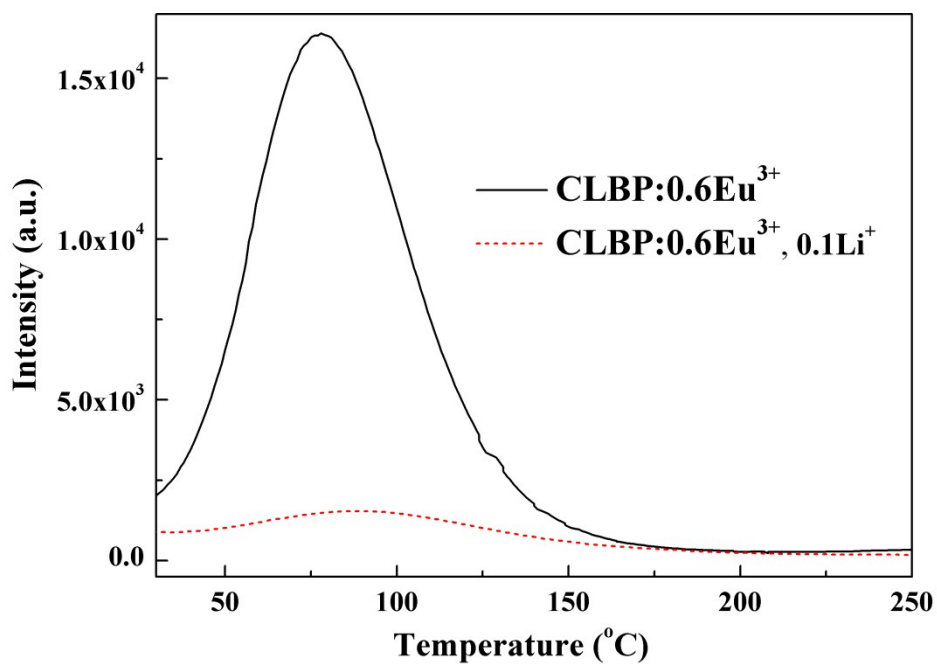

Fig. S2 Thermoluminescence spectra of CLBP:0.6Eu<sup>3+</sup> and CLBP:0.6Eu<sup>3+</sup>, 0.1Li<sup>+</sup>.
